# Supplementary material for: Environmental actions, support for policy, and information’s provision: experimental evidence from the US
Source: Springer Nature journal article supplement (doi:10.1007/s10584-025-03941-4), 2025-05-01
Supplement: MOESM1 [file 10584_2025_3941_MOESM1_ESM.docx]

**Online Appendix for:**

**Environmental Actions, Support for Policy, and Information Provision: Experimental Evidence from the US**

## Contents

1 Main variables used in the empirical analysis 2

2 Item scaling for the analysis of the experimental results 5

3 Testing for heterogeneous treatment effects among unobservables 7

4 Prospective and retrospective treatments 8

1. **Main variables used in the empirical analysis**

**Dependent variables**

1. *Support for Pro-Environmental Policies* (0 oppose, 1 support): mean: 0.573. sd: 0.310
2. Require that 50% of all vehicles sold in the U.S. by 2030 be electric.
3. Require that each state use a minimum amount of renewable fuels (wind, solar, and hydroelectric) in the generation of electricity even if electricity prices increase.
4. Repeal the Clean Power Plant Rules, which calls for power plants to cut greenhouse gas emissions by 32 percent by 2030. [*reverse coded*]
5. Withdraw the United States from the Paris Climate Agreement. [*reverse coded*]
6. Increase taxes on fossil fuels.
7. Increase government subsidies for renewable energy such as solar and wind.
8. Ban the sale of household appliances that do not meet energy efficiency standards.

Using Item Response Theory (IRT) 2-parameter logistic model, we produce a single latent variable with a mean of 0 and standard deviation of 1, which we then re-scaled to range from 0 to 1, with higher values representing more support for policies that address climate change.

1. *Pro-Environmental Actions* (0 not planning on taking the action, 1 had taken or was planning to take that action): mean: 0.594, sd: 0.267
2. Install solar panels at your home
3. Purchase a hybrid or electric car
4. Recycle on a daily or weekly basis
5. Take steps to increase your home's energy efficiency
6. Purchase carbon offsets to make up for the carbon you consume
7. Reduce your weekly amount of meat consumption
8. Take fewer trips by plane

Using Item Response Theory (IRT) 2-parameter logistic model, we produce a single latent variable with a mean of 0 and standard deviation of 1, which we then re-scaled to range from 0 to 1, with higher values representing more pro-environmental actions/intentions.

Table 1A: distribution of pro-environmental actions by partisanship.

|  | Democrats | Independents | Republicans |
| --- | --- | --- | --- |
|  | Install solar panels | | |
| Done | 155 | 26 | 60 |
| Plan to do | 443 | 152 | 264 |
| Not plan to do | 609 | 265 | 609 |
|  | Purchase hybrid or electric car | | |
| Done | 127 | 22 | 56 |
| Plan to do | 571 | 146 | 244 |
| Not plan to do | 510 | 277 | 627 |
|  | Recycle on daily or weekly basis | | |
| Done | 873 | 283 | 637 |
| Plan to do | 252 | 95 | 156 |
| Not plan to do | 82 | 68 | 140 |
|  | Increase home's energy efficiency | | |
| Done | 554 | 177 | 420 |
| Plan to do | 501 | 169 | 320 |
| Not plan to do | 153 | 97 | 193 |
|  | Purchase carbon offsets | | |
| Done | 140 | 40 | 78 |
| Plan to do | 441 | 126 | 187 |
| Not plan to do | 626 | 280 | 664 |
|  | Reduce meat consumption | | |
| Done | 503 | 136 | 238 |
| Plan to do | 315 | 88 | 141 |
| Not plan to do | 390 | 222 | 551 |
|  | Fewer trips by plane | | |
| Done | 699 | 245 | 453 |
| Plan to do | 203 | 70 | 123 |
| Not plan to do | 304 | 130 | 356 |

Table 2A: distribution of support for pro-environmental policies by partisanship.

|  | Democrats | Independents | Republicans |
| --- | --- | --- | --- |
|  | 50% of vehicles sold in the US by 2030 electric | | |
| Support | 879 | 205 | 302 |
| Oppose | 322 | 240 | 628 |
|  | Minimum amount of renewable fuels for electricity | | |
| Support | 1005 | 272 | 483 |
| Oppose | 197 | 171 | 447 |
|  | Repeal the Clean Power Plant Rules | | |
| Support | 665 | 249 | 524 |
| Oppose | 537 | 194 | 407 |
|  | Withdraw from Paris Climate Agreement | | |
| Support | 304 | 159 | 532 |
| Oppose | 897 | 283 | 397 |
|  | Increase taxes on fossil fuels | | |
| Support | 714 | 143 | 193 |
| Oppose | 486 | 299 | 736 |
|  | Increase subsidies for renewable energy | | |
| Support | 1024 | 305 | 542 |
| Oppose | 172 | 134 | 391 |
|  | Ban sales of energy inefficient household appliances | | |
| Support | 867 | 227 | 410 |
| Oppose | 331 | 217 | 521 |

**Independent variables**

Treatment variables:

- *Partisanship*: 1 Democrats, 2 Independents/other, 3 Republicans
  - Respondents who identified as independents but then indicated that they lean towards one party were re-assigned as partisans.
- *Climate Change Information Provision*: 1 Control, 2 Prospective local, 3 Retrospective local, 4 Party labels.

Controls:

- *Assignment of Responsibility:* Please indicate whether you think each group has a responsibility to take action to address climate change: 1 Individuals, 2 Corporations, 3 Governments:
- *Political Ideology*: recoded to 0 Very conservative, 0.25, 0.5, 0.75, 1 Very liberal: mean: 0.489, sd: 0.280
- *Gender*: 0 male, 1 female
- *Children under 18*: 0 No, 1 Yes
- *Church Attendance*: recoded to 0 No, 0.25, 0.5, 0.75, 1 Yes: mean: 0.465, sd: 0.383
- *Race:* White; Black or African-American; Hispanic, Latino, or Spanish origin; or Other
- *Social Trust:* recoded to 0 none, 0.33. 0.67, 1 a great deal: mean: 0.425, sd: 0.272
- *Egalitarianism:* recoded to 0 Not egalitarian, 0.25, 0.5, 0.75, 1 Very egalitarian: mean: 0.842, sd: 0.234
- *Age:* 18-95: mean: 46.7, sd: 17.01
- *Urban/Rural:* 1 Live in city, 2 live in suburbs, 3 live in rural area
- *Perceptions of Climate Change*: From what you know about global climate change or global warming, which one of the following statements comes closest to your opinion? We recode this variable so that it ranges from 0 (“Global climate change is not occurring; this is not a real issue”) to 1 (“Global climate change has been established as a serious problem, and immediate action is necessary”), with higher values representing more desire to take action on climate change.: mean: 0.784, sd.: 0.267
  - Global climate change has been established as a serious problem, and immediate action is necessary.
  - There is enough evidence that climate change is taking place and some action should be taken.
  - We don't know enough about global climate change, and more research is necessary before we take any actions.
  - Concern about global climate change is exaggerated. No action is necessary.
  - Global climate change is not occurring; this is not a real issue.

1. **Item scaling for the analysis of the experimental results**

In our analysis of the experiment, we use two dependent variables that are scales constructed from multiple items. Here we provide full additional details about the scaling of these items.

As discussed in the main text, we re-coded the individual actions’ variable so that each item was coded as a 1 if the respondent had taken or was planning to take that action and 0 if they were not planning on taking the action. Since each of the items asking subjects about personal actions that they have taken (or would take) were binary, as it is the case for the policy items’ variable, for both dependent variables we combined the items using an Item Response Theory (IRT) two-parameter logistic (2PL) model. The 2PL IRT model is similar to a graded response model but simplified for two category responses. Tables 3A and 4A show the discrimination parameters for each item used to create the policy item and personal actions scale. Discrimination parameters are a measure of how strongly related each item is to the underlying latent variable (akin to factor loadings). The tables show that, except for the fourth item in Table 3A (withdrawal from the Paris climate agreement), each item has a statistically significant association with the latent trait (p*<*.001).

For the policy scale, the items with the strongest relationship are the ones asking respondents whether they support or oppose the requirement that 50% of all vehicles sold in the U.S. by 2030 will be electric and that each US State use a minimum amount of renewable fuels (wind, solar, and hydroelectric) in the generation of electricity even if electricity prices increase.

Table 3A: Discrimination Parameters from IRT Policy Item Scaling

| Item | Discrimination parameter | Std. Error |
| --- | --- | --- |
| 50% of all vehicles sold in the US electric by 2030 | 2.445 | 0.162 |
| Minimum renewables for electricity even if prices increase | 2.236 | 0.143 |
| Repeal Clean Power Plant Rules | 0.013 | 0.047 |
| Withdraw from Paris Climate Agreement | -0.798 | 0.060 |
| Increase taxes on fossil fuels | 1.941 | 0.121 |
| Increase government subsidies for renewable energy | 2.033 | 0.128 |
| Ban sale of appliances that are not energy efficient | 1.519 | 0.089 |

For the personal actions’ scale, the items with the strongest relationship are the ones asking respondents whether they recycle on a daily or weekly basis, and whether they have taken or plan to take steps to increase their home's energy efficiency.

Table 4A: Discrimination Parameters from IRT Personal Actions Item Scaling

| Item | Discrimination parameter | Std. Error |
| --- | --- | --- |
| Solar panels | 1.795 | 0.112 |
| Hybrid or electric car | 1.689 | 0.103 |
| Recycle on a daily or weekly basis | 2.064 | 0.157 |
| Increase home’s energy efficiency | 2.000 | 0.138 |
| Purchase carbon offsets | 2.247 | 0.151 |
| Reduce meat consumption | 1.432 | 0.088 |
| Fewer trips by plane | 1.202 | 0.078 |

In addition to using an IRT model for the dependent variables, we have also used an IRT graded response model to scale the three items in the assignment of responsibility variable. Table 5A produces the discrimination parameters from the scaling of these items. The discrimination parameter for each item is statistically significant (p*<*.001) and strongly associated with the underlying latent trait.

Table 5A: Discrimination Parameters from IRT Assignment of Responsibility Item Scaling

| Item | Discrimination parameter | Std. Error |
| --- | --- | --- |
| Individual people | -0.293 | 0.048 |
| Governments | 2.473 | 0.538 |
| Corporations | 0.356 | 0.049 |

1. **Testing for heterogeneous treatment effects among unobservables**

We explore whether our data provides any evidence of heterogenous treatment effects among unobserved covariates. To do this, we follow the methods developed by Ding, Feller, and Miratrix (2016), which involves comparing the distributions of our dependent variables across the control and treatment groups after adjusting for the overall treatment effect. This approach is based on permutated Fisher randomization tests (FRT) and accounts for the uncertainty regarding the average treatment effect to produce a robust test of the null hypothesis of constant treatment effects across subjects. We implement this test using the *hettx* R package.

Table 6A shows the results from this approach. To reiterate, the null hypothesis for this test is constant (or homogenous) treatment effects across observations. A p< less than 0.05 would indicate that we can reject this null hypothesis with 95% confidence, leading us to conclude that the treatment effects we detect are heterogeneous in nature. Notably, none of the p<s are statistically significant. Thus, we cannot reject the null hypothesis of homogeneous treatment effects for any of the treatments across either of our two main dependent variables.

Table 6A: Testing for heterogeneous treatment effects

| Treatment | Individual actions scale | Policy scale |
| --- | --- | --- |
| Prospective  local information | p = 0.320 | p = 0.298 |
| Retrospective  local information | p = 0.884 | p = 0.310 |
| Party labels | p = 0.552 | p = 0.176 |

Note: Table 6A reports p<s from permutated Fisher randomization tests against the null hypothesis of constant treatment effects (Ding, Feller, and Miratrix 2016).

**4 Prospective and retrospective treatments**

**4.1 Prospective climate change information**

To provide information on future changes in temperature and precipitation, we use the online interactive map constructed at the Center for Environmental Science at the University of Maryland. The map is available at the following website: <https://fitzlab.shinyapps.io/cityapp/> Full details on the data, forecast models, and on the methods used to identify the comparison cities are provided in Fitzpatrick, M.C., Dunn, R.R. “Contemporary climatic analogs for 540 North American urban areas in the late 21st century.” *Nat Commun*, 10, 614 (2019). <https://doi.org/10.1038/s41467-019-08540-3>

**4.2 Retrospective climate change information**

To provide past information on climate change, we constructed the closest retrospective equivalent to the prospective information’s map in Section 4.1 above by building an identical map to provide information on past changes in temperature and in precipitation. As for the prospective climate change information map, to compute past changes in temperature and in precipitation, we use historical climate records provided by WorldClim, which is a database of high spatial resolution global weather and climate data (<https://worldclim.org/data/index.html>).

**4.2.1 Temperature**

For each city on the map, we computed the percentage change in temperature between the twenty-nine years’ period 1991-2019 and the thirty years’ period 1960-1990, separately for the winter season (December-March) and for the summer season (June-September). The construction of the percentage change in temperature involved the following computations:

- Average monthly temperature for each month and for each year between 1960 and 2019.

- Average annual temperature for each year between 1960 and 2019.

- Average temperature for the three periods 1960-2019, 1960-1990, and 1991-2019.

- Percentage difference in average temperature between 1991 and 2019 (with respect to the average change between 1960 and 2019) and percentage difference in average temperature between 1960 and 1990 (with respect to the average change between 1960 and 2019).

**4.2.2 Precipitation**

For each city on the map, we computed the percentage difference between the average cumulative precipitation in the twenty-nine years’ period 1991-2019 and the average cumulative precipitation in the thirty years’ period 1960-1990, separately for the winter season (December-March) and for the summer season (June-September). The construction of the percentage change in precipitation involved the following computations:

- Yearly cumulative precipitation for each city and for each year between 1960 and 2019.

- Average yearly cumulative precipitation in the period 1960-1990 and in the period 1991-2019.

- Difference in precipitation between the average yearly cumulative precipitation in the period 1991-2019 and the average yearly cumulative precipitation in the period 1960-1990.

- Percentage change of the difference in precipitation computed in the previous step relative to the average yearly cumulative precipitation in the period 1960-1990.
